# Supplementary material
Source: publisher figshare collection journal article supplement (https://tandf.figshare.com/articles/dataset/_/11688927)
Supplement: Supplementary file 1 [file 1]

Supplemental figure

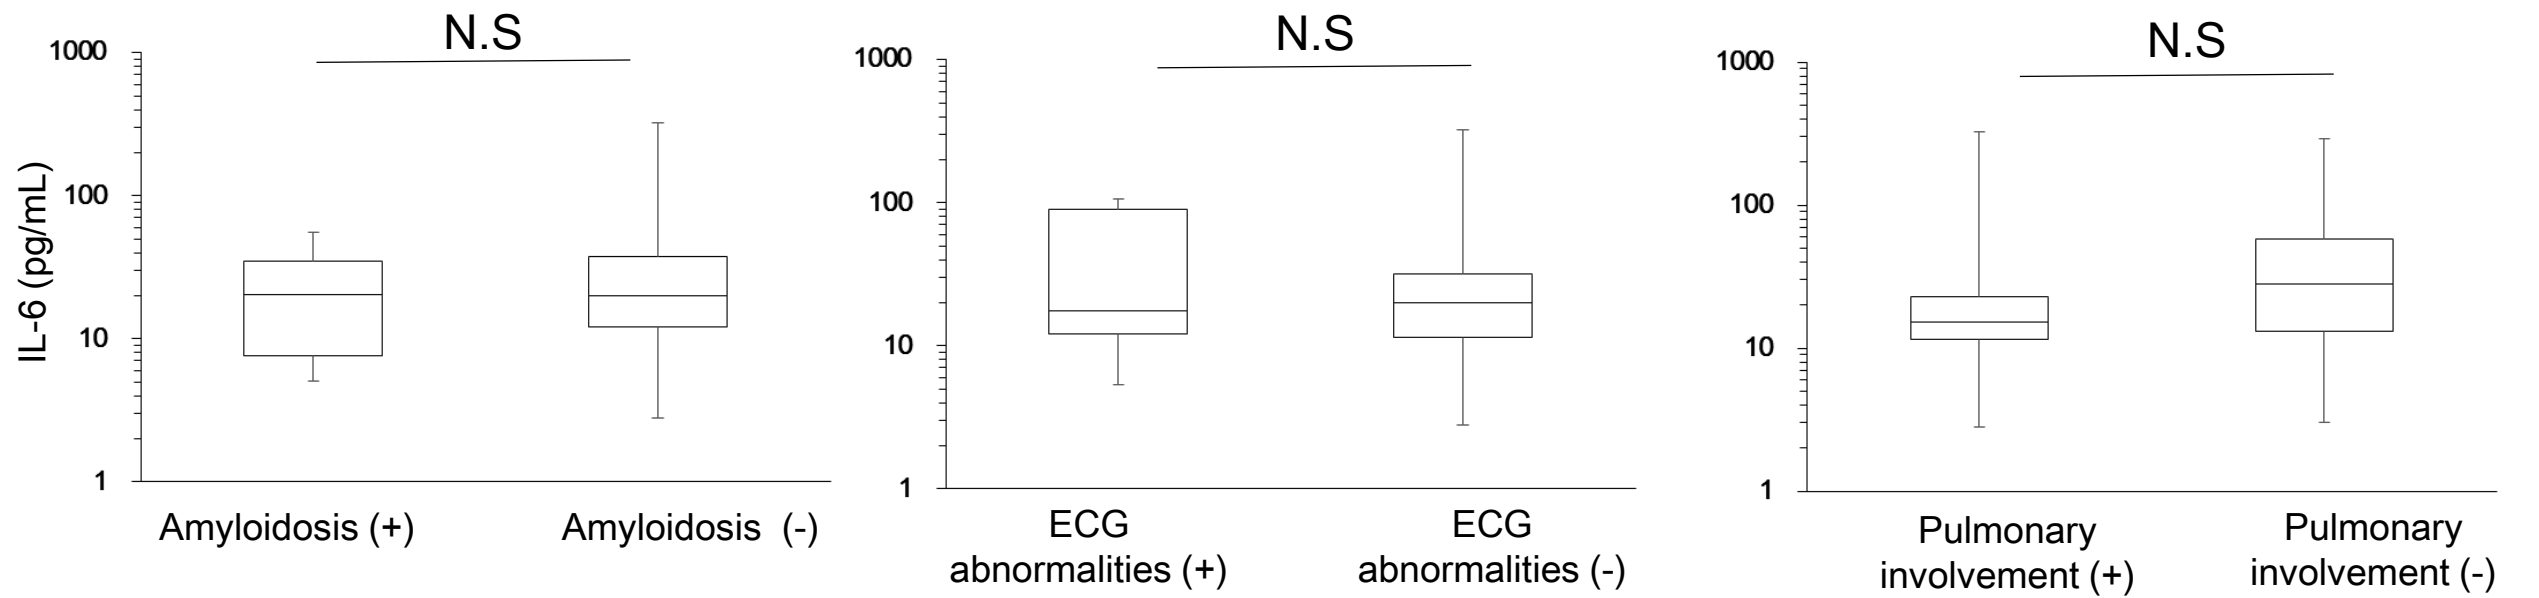

|        | Amyloidosis (+) | Amyloidosis (-) |
|--------|-----------------|-----------------|
| Median | 20.3            | 20.1            |
| N      | 6               | 53              |

|        | ECG abnormalities (+) | ECG abnormalities (-) |
|--------|-----------------------|-----------------------|
| Median | 17.5                  | 19.9                  |
| N      | 10                    | 48                    |

|        | Pulmonary involvement (+) | Pulmonary involvement (-) |
|--------|---------------------------|---------------------------|
| Median | 15.1                      | 27.8                      |
| N      | 31                        | 28                        |
